# Supplementary material
Source: publisher site journal article supplement (https://www.dovepress.com/article/393093)
Supplement: Supplementary file 1 [file get_supplementary_file.php]

| **Title** | Barriers and facilitators to ART adherence following intensive adherence counseling among HIV clients in Lira District: a qualitative study |
| --- | --- |
| **Respondent ID** |  |
| **Date of the interview** |  |
| **Introduction** | Introduce self, build rapport with the participants, and ensure the informed consent from is signed |
| **Socio-demographic characteristics** | 1. How old are you? 2. Gender:   **0.** Male **1.** Female   1. What is your highest level of education?   **0.** No formal education **1.** Completed primary education **2.** Completed ‘O’ level secondary education **3.** Completed ‘A’ level secondary education **4.** Tertiary education   1. What is your marital status?   **0.** Single **1.** Married **2.** Divorced **3.** Cohabiting   1. What is your occupation?   **0.** House wife **1.** Peasant farmer **2.** Business **3.** Civil servant **4.** Others |
| **Discussion guide** | **Probes** |
| **ART adherence** | 1. When did you enroll to IAC? 2. How is your attendance to IAC sessions? 3. What are your experiences during IAC sessions? 4. How is your ART adherence since enrolling to IAC? |
| **Capability** | 1. What knowledge, skills, abilities, or proficiencies acquired through the IAC program facilitate your adherence to ART? 2. What gaps in knowledge, skills, and abilities hinder your adherence to ART while in the IAC program? |
| **Opportunities** | 1. How does your environment or resources influence your adherence to ART while in the IAC program? 2. How does your social influences (social pressure, norms, conformity, and social comparison) influence your ART adherence while in the IAC program? |
| **Motivation** | 1. What motivates you to adhere to your medicine while in the IAC program? 2. What kills your motivation to adhere to your medicine while in the IAC program? |
| **Closure** | Is there anything more you would like to add?  I’ll be analyzing the information you and others gave me and submitting a draft report to a peer-reviewed journal for publication. I’ll be happy to send you a copy to review at that time, if you are interested.  Thank you for your time and participation. |
